# Supplementary material for: Integrated Genomics Identifies miR-32/MCL-1 Pathway as a Critical Driver of Melanomagenesis: Implications for miR-Replacement and Combination Therapy
Source: PubMed Central journal article supplement (PMC5113037; doi:10.1371/journal.pone.0165102), 2016-11-15

**A**  
Chr9  
(q31.3)

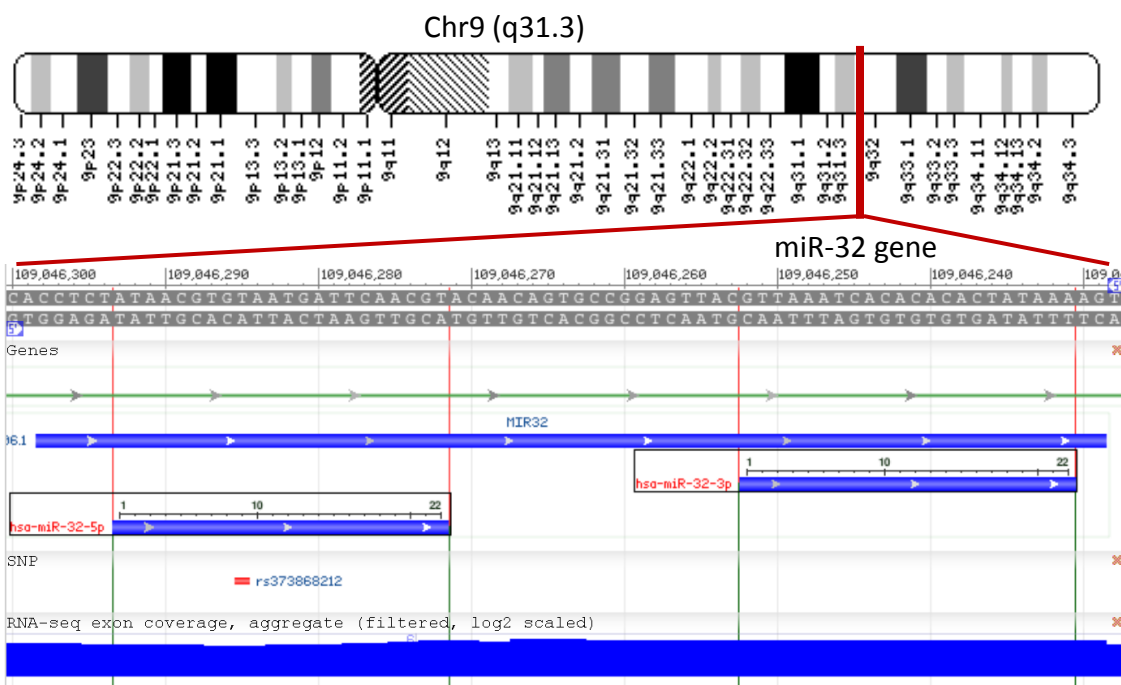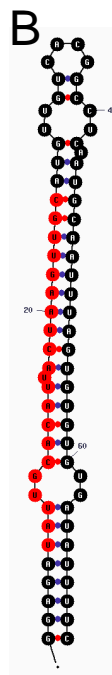

Supplement: pone.0165102.s003.pdf [file pone.0165102.s003.pdf]
